# Supplementary material for: Clean Air Act mitigate the cognitive deterioration in older adults
Source: Research Square preprint supplement (doi:10.21203/rs.3.rs-492930/v1), 2021-05-18
Supplement: Supplementary file 2 [file b67d0230957fcf002d5295e5.docx]

**Supplementary Information**

**Clean Air Act mitigate the cognitive deterioration in older adults**

Yao Yao, Xiaozhen Lv, Chengxuan Qiu, Jiajianghui Li, Xiao Wu, Hao Zhang, Dahai Yue, Ehab Salah Eshak, Kaarin J. Anstey, Gill Livingston, Tao Xue, Junfeng (Jim) Zhang, Huali Wang, Yi Zeng

**Contents**

Supplementary Methods

*Flow Chart* …………………………………..………………………………………………………. Page 2

*China’s Clean Air Act* (CCAA) …………………………………………………………………….…. Page 3

*Environmental Assessment …..*…………….………………………………………………………… Page 3

*Mini-Mental State Examination* ………………………………….………………….………………. Page 4

*Descriptions of covariates* …………………………………………………………………………... Page 4

*Two-pollutant exposure-response analysis* ………………………………………………….………. Page 5

Table A1: STROBE Statement—Checklist for Observational Studies …………………………………. Page 6

Table A2: Targets of CCAA for local governments in our study area …………….…..…………………. Page 7

Figure A1: Trend in outcomes and PM2.5 exposure before the CCAA .……………………………….….. Page 9

Figure A2: Summaries for cognitive function score (MMSE) and long-term exposure to air pollutants by survey waves and group ……………………………………………………….………..………………………. Page 10

Figure A3: Sensitivity analysis of estimated effect of the CCAA on changes in global cognitive score by difference-in-differences models .……………………………………………………………………… Page 11

Figure A4: The estimated effect of the CCAA on cognitive function by subgroups …………….……… Page 12

Figure A5: The estimated associations between cognitive function and long-term air pollution exposure by further controlling seasonal effect .…………………………………………………………….……..…. Page 13

Figure A6: The estimated associations between air pollution changes and MMSE change by different subpopulations .…………………………………………………………………………………………. Page 14

Figure A7: The joint exposure-response function for PM2.5 and O3 ..………………………..…………. Page 15

Figure A8: The joint exposure-response function for SO2 and O3 ..…………………………..…………. Page 16

Figure A9: The joint exposure-response function for PM2.5 and SO2 ..………….……………..……. Page 17

Appendix References……………………………………………………………..……………….…. Page 18

**Supplementary Methods**

*Flow chart of study participants in the Chinese Longitudinal Health Longevity Survey, 2014 to 2018*

Excluded (n=4286)

- Died during the follow-up (n=2226)

- Lost of or declined follow-up (n=1503)

- With dementia, stroke, or bed-ridden

status in baseline (n=557)

Excluded (n=94)

- With missing data for MMSE and any

covariates (n=56)

- Changed of or declined to provide

residential address (n=38)

Control group

(n=561)

Intervention group

(n=2251)

Grouping according to the implementation of CCAA

Included in analysis

(n=2812)

Participants with follow-up in

8th CLHLS, 2018

(n=2906)

Participants in 7th CLHLS, 2014

(n=7192)

*China’s Clean Air Act*

To address severe air pollution issues and protect public health, the State Council of China promulgated the China’s Clean Air Act (CCAA) on September 10, 2013,1 in which PM2.5 concentration reductions of 25%, 20%, and 15% in 2017 compared to the level in 2013 were mandated in 3 key regions: the Beijing-Tianjin-Hebei region (BTH), the Yangtze River Delta region (YRD), and the Pearl River Delta region (PRD), respectively.2,3

China’s Clean Air Act (CCAA) was promulgated by the central government and has mandatory administrative power on the local authorities (i.e., Prefectural and municipal governments). To fulfil the CCAA, local governments implemented a series clean air actions and committed to devote the following years (2014-2017) to reducing, as appropriate in the regional context, particulate air pollution with regard to improving air quality and living environment. Six major measures were implemented from 2013 to 2017, they were summarized as (ⅰ) Strengthen industrial emission standards; (ⅱ) Phase out small and polluting factories; (ⅲ) Phase out outdated industrial capacity; (ⅳ) Upgrades on industrial boilers; (ⅴ) Promote clean fuels in the residential sector; (ⅵ) Strengthen vehicle emission standards. The detail of the six measures were described in previously.2 As the toughest-ever clean air policy, CCAA has reduced the national population-weighted annual mean PM2.5 concentrations from 61.8 μg/m3 in 2013 to 42.0 μg/m3 in 2017.1,2 The PM2.5 concentration reductions in BTH, YRD, and PRD from 2013 to 2017 were 39.6%, 34.3%, and 27.7%, respectively, indicating that the local governments have generally achieved the goals of CCAA.

*Environmental Assessment*

We obtained air pollution data from a reanalysis product,4 which ensembles ground surface observations with high-resolution air quality modelling outputs using the Kalman Filter. The original database provides hourly maps in a 15 km × 15 km grid across China for six species of air pollutants (PM2.5, PM10, SO2, NO2, O3, and CO), from 2013 to 2018, which covers our study duration. The cross-validation results show that the ensemble estimates are in a good agreement with monitoring observations, and the correlation R2 is reported as 0.81, 0.72, 0.62, 0.61, 0.76, or 0.55 for PM2.5, PM10, SO2, NO2, O3, or CO, respectively. The reanalysis dataset can be publicly accessed from http://www.en.scidb.cn/en/detail?dataSetId=696756084735475712&language=zh_CN&dataSetType=personal. We first averaged the monthly original air pollution data, and then linked them to each subject according to the survey date (year and month) and geo-coded addresses. For each subject, we further calculated the average concentrations of six species of air pollutants during the 12 months preceding the survey as the long-term exposure level.

We also obtained estimates of temperature with an original resolution of 0.1° × 0.1° by fusing the satellite measurements of land surface temperatures, *in-situ* observations, and simulations from a weather-forecast research model.5 Random cross-validations indicated that the estimates were in good agreement with the monitored values (R2 = 0.96). Details of the temperature data assembly are documented previously.5 Individual-level monthly averages for temperature data were also calculated for each participant record before the regression analyses.

*Mini-Mental State Examination*

We used Chinese version of MMSE to assess the cognitive function and cognitive decline in this study, according to *Standardized Mini-Mental State Examination—A user’s guide* by Dr. D. William Molloy and Dr. Roger Clarnette. The Chinese version of MMSE has been widely used in epidemiologic of Chinese older population.6-8 MMSE, as a screening tool for cognitive impairment, is frequently used to track changes in cognitive function over time and to assess the effects of treatments on cognitive function in environmental study.9 MMSE includes tests of orientation to time and place (knowing where you are, and the season or day of the week), short-term memory (recall), attention and ability to solve problems (like spelling a simple word backwards), language (identifying common objects by name), comprehension and motor skills (drawing a slightly complicated shape like two pentagons intersecting). The maximum MMSE score is 30 points. Scores of 25-30 out of 30 are considered normal; the National Institute for Health and Care Excellence (NICE) classifies 21-24 as mild, 10-20 as moderate and <10 as severe impairment.10 The questionnaire of Chinese Longitudinal Healthy Longevity Survey (CLHLS) and scoring methods of MMSE can be referred to: https://sites.duke.edu/centerforaging/programs/chinese-longitudinal-healthy-longevity-survey-clhls/survey-documentation/questionnaires/.

*Descriptions of covariates*

We assessed a range of demographic, behavioural, and socioeconomic factors as covariates, including age, sex, education, marital status, ethnicity, rural/urban residence, occupation, physical labour, survey month, alcohol drinking, smoking, physical activity, fruit intake, vegetable intake, water quality, living condition, income source, and ambient temperature.

Age was calculated according to self-reported dates of birth. If dates were converted into Georgian calendar dates if they were based on Chinese lunar calendar dates. Education was recorded as years of schooling; and Levels of educational attainment were further grouped into three categories according to years of schooling (0, 1-5, and ≥6 years). Marital status was divided as “currently married and living with spouse” or others (widowed, separated, divorced, or never married). Ethnicity was dichotomized as “Han” or “non-Han”. Current residence was dichotomized as “urban residence” or “rural residence” according to their household registration booklet (Hukou). Alcohol drinking, smoking and physical activity were dichotomized into two responses, e.g., regular physical activity was used as an indicator of health behavior and was dichotomized into “not doing exercise” (coded as 0) and “doing exercise” (coded as 1).  Living condition was grouped into 3 categories: living with family members or others, living alone, and living in an institution. Frequency of fruit intake and vegetable intake was both grouped into 4 categories: very often (at least 5 times a week), often (1-4 times a week), sometime (less than 1 time a week but more than 1 time a month), and rare (less than 1 time a month). Water quality was classified as: tap water, water from nature sources, and well water. Income source was classified as: relatives, retirement pension, social insurance, and working payment. Ambient temperature was calculated as individual-level monthly gridded estimates of temperature from the satellite measurements of land surface temperatures.

*Two-pollutant exposure-response analysis*

Due to the pairwise correlations between different air pollutants, interpretation on causal effect of a specific air quality indicator should be very cautious. For instance, our difference-in-difference reported a positive association between O3 exposure and cognitive function. Ignoring the co-varied trend between PM2.5 and O3 during the study period will lead to false conclusion of beneficial effect of O3. Actually, the clean air policy, despite improving the overall quality of ambient environment, had a side effect of O3 growth. Therefore, distinguishing the causal effect of an air pollutant should be based on the observational data, where the other pollutants are unchanged. Unfortunately, China’s clean air actions did not provide such a scenario, and thus is not appropriate for causal inference on health effect of a specific air pollutant. To further illustrate that, we conducted a post-hoc sensitivity analysis by linking MMSE change with PM2.5 and O3 changes jointly, in a nonlinear model (Figure A7). The joint exposure model can estimate the conditional associations. Given the condition of constant O3, there was a significant negative association between PM2.5 change and MMSE change. While, conditioned on the unchanged PM2.5 (which is a very rare among our observations), the overall estimate for O3 was statistically non-significant. However, there was a weak association between O3 increment and declined MMSE, which suggests exposing to increased concentration of O3 alone (without the simultaneously-varied PM2.5) as toxic. Analogously, we developed the joint exposure models for SO2-O3 (Figure A8) and SO2-PM2.5 (Figure A9). The modelling results consistently suggest marginally adverse effects of air pollutants on cognitive function. We didn’t develop joint model for > 2 species of air pollutants, due to the dimensionality and the rare observations with restriction of multiple exposures as invariant. Given the possibility of high-ordered correlations, causal inference on health effects of multiple air pollutants is difficult, and beyond the scope of this study.

The drastic change of PM also increased the level of O3, future clean air policy in China should not only focused on the PM reduction towards WHO standard, but also should cautious for the continuing increment of O3 concentrations. Ozone (the triplet oxygen, O3), formation depends on solar intensity that is directly associated with atmospheric temperature. Ironically, with a decrease in ambient concentrations of carbonaceous aerosols (e.g., soot), emitted from combustion of coal, diesel, and biomass, atmospheric visibility increases, and consequently solar intensity increases, favouring ozone formation.11 More importantly, particulate matter (e.g., PM2.5) can serve as a sink of free radicals responsible for O3 formation. A recent study showed that a 40% reduction in PM2.5from 2013 to 2017 in the North China was partly responsible for an increasing ozone trend (at 1–3 ppb per year).12 As PM2.5 levels continue to fall, ozone is going to keep getting worse. In addition to the success of CCAA, results from a recent study suggest that extra efforts are needed to reduce NOx and VOC emissions in order to stem the tide of ozone pollution.12

**Table A1. STROBE Statement—Checklist for Observational Studies.**

| STROBE Checklist | Item No. | Recommendation | Location Addressed in Manuscript |
| --- | --- | --- | --- |
| **Title and abstract** | 1 | (*a*) Indicate the study’s design with a commonly used term in the title or the abstract | Title and abstract |
| (*b*) Provide in the abstract an informative and balanced summary of what was done and what was found |
| Introduction | | |  |
| Background/rationale | 2 | Explain the scientific background and rationale for the investigation being reported | Introduction |
| Objectives | 3 | State specific objectives, including any prespecified hypotheses |
| Methods | | |  |
| Study design | 4 | Present key elements of study design early in the paper | Methods |
| Setting | 5 | Describe the setting, locations, and relevant dates, including periods of recruitment, exposure, follow-up, and data collection | Methods,  Study population |
| Participants | 6 | (*a*) *Cohort study*—Give the eligibility criteria, and the sources and methods of selection of participants |
| Variables | 7 | Clearly define all outcomes, exposures, predictors, confounders, and effect modifiers. Give diagnostic criteria, if applicable | Methods, Supplementary Methods |
| Data sources/ measurement | 8 | For each variable of interest, give sources of data and details of methods of assessment (measurement). Describe comparability of assessment methods if there is more than one group |
| Bias | 9 | Describe any efforts to address potential sources of bias | Methods, Discussion |
| Study size | 10 | Explain how the study size was arrived at | Methods, Supplementary Methods |
| Quantitative variables | 11 | Explain how quantitative variables were handled in the analyses. If applicable, describe which groupings were chosen and why | Methods, Supplementary Methods |
| Statistical methods | 12 | (*a*) Describe all statistical methods, including those used to control for confounding;  (*b*) Describe any methods used to examine subgroups and interactions;  (*c*) Explain how missing data were addressed;  (*d*) If applicable, describe analytical methods taking account of sampling strategy;  (*e*) Describe any sensitivity analyses | Methods,  Statistical analyses |
| Results | | |  |
| Participants | 13 | (a) Report numbers of individuals at each stage of study— e.g., numbers potentially eligible, examined for eligibility, confirmed eligible, included in the study, completing follow-up, and analysed | Results,  Methods, Supplementary Methods |
| (b) Give reasons for non-participation at each stage |
| (c) Consider use of a flow diagram |
| Descriptive data | 14 | (a) Give characteristics of study participants (e.g., demographic, social) and information on exposures and potential confounders | Results,  Methods, Supplementary Methods |
| (b) Indicate number of participants with missing data for each variable of interest |
| Outcome data | 15 | Report numbers of outcome events or summary measures | Results |
| Main results | 16 | (*a*) Give unadjusted estimates and, if applicable, confounder-adjusted estimates and their precision (e.g., 95% confidence interval). Make clear which confounders were adjusted for and why they were included;  (*b*) Report category boundaries when continuous variables were categorized;  (*c*) If relevant, consider translating estimates of relative risk into absolute risk for a meaningful time period | Results |
| Other analyses | 17 | Report other analyses done—e.g., analyses of subgroups and interactions, and sensitivity analyses | Results, Supplementary file |
| Discussion | | |  |
| Key results | 18 | Summarise key results with reference to study objectives | Discussion |
| Limitations | 19 | Discuss limitations of the study, taking into account sources of potential bias or imprecision. Discuss both direction and magnitude of any potential bias | Discussion |
| Interpretation | 20 | Give a cautious overall interpretation of results considering objectives, limitations, multiplicity of analyses, results from similar studies, and other relevant evidence | Discussion |
| Generalisability | 21 | Discuss the generalisability (external validity) of the study results | Discussion |
| Other information | | |  |
| Funding | 22 | Give the source of funding and the role of the funders for the present study and, if applicable, for the original study on which the present article is based | Author statement form |

**Table A2. Varying targets of CCAA for local governments (provinces) in China**

| **Name** | **Target of PM2.5 reduction (%)** | **Included in CLHLS** | **Assignment** |
| --- | --- | --- | --- |
| Beijing | 25 | Yes | Intervention group |
| Tianjin | 25 | Yes | Intervention group |
| Hebei | 25 | Yes | Intervention group |
| Shanxi | 20 | Yes | Intervention group |
| Inner Mongolia | 10 | No | - |
| Shanghai | 20 | Yes | Intervention group |
| Shandong | 20 | Yes | Intervention group |
| Jiangsu | 20 | Yes | Intervention group |
| Anhui | 10 | Yes | Intervention group |
| Jiangxi | 5 | Yes | Control group |
| Fujian | 5 | Yes | Control group |
| Zhejiang | 20 | Yes | Intervention group |
| Guangdong | 15 | Yes | Intervention group |
| Guangxi | 5 | Yes | Control group |
| Hainan | 0 | Yes | Control group |
| Henan | 15 | Yes | Intervention group |
| Hunan | 10 | Yes | Intervention group |
| Hubei | 12 | Yes | Intervention group |
| Xinjiang | 15 | No | - |
| Qinghai | 15 | No | - |
| Ningxia | 10 | No | - |
| Gansu | 12 | No | - |
| Shaanxi | 15 | Yes | Intervention group |
| Sichuan | 10 | Yes | Intervention group |
| Guizhou | 5 | No | - |
| Tibet | 0 | No | - |
| Yunnan | 0 | No | - |
| Chongqing | 15 | Yes | Intervention group |
| Heilongjiang | 5 | Yes | Control group |
| Jilin | 10 | Yes | Intervention group |
| Liaoning | 10 | Yes | Intervention group |

Note: CCAA, China’s Clean Air Act; PM2.5, particulate matter that has a diameter of less than 2.5 micrometres.


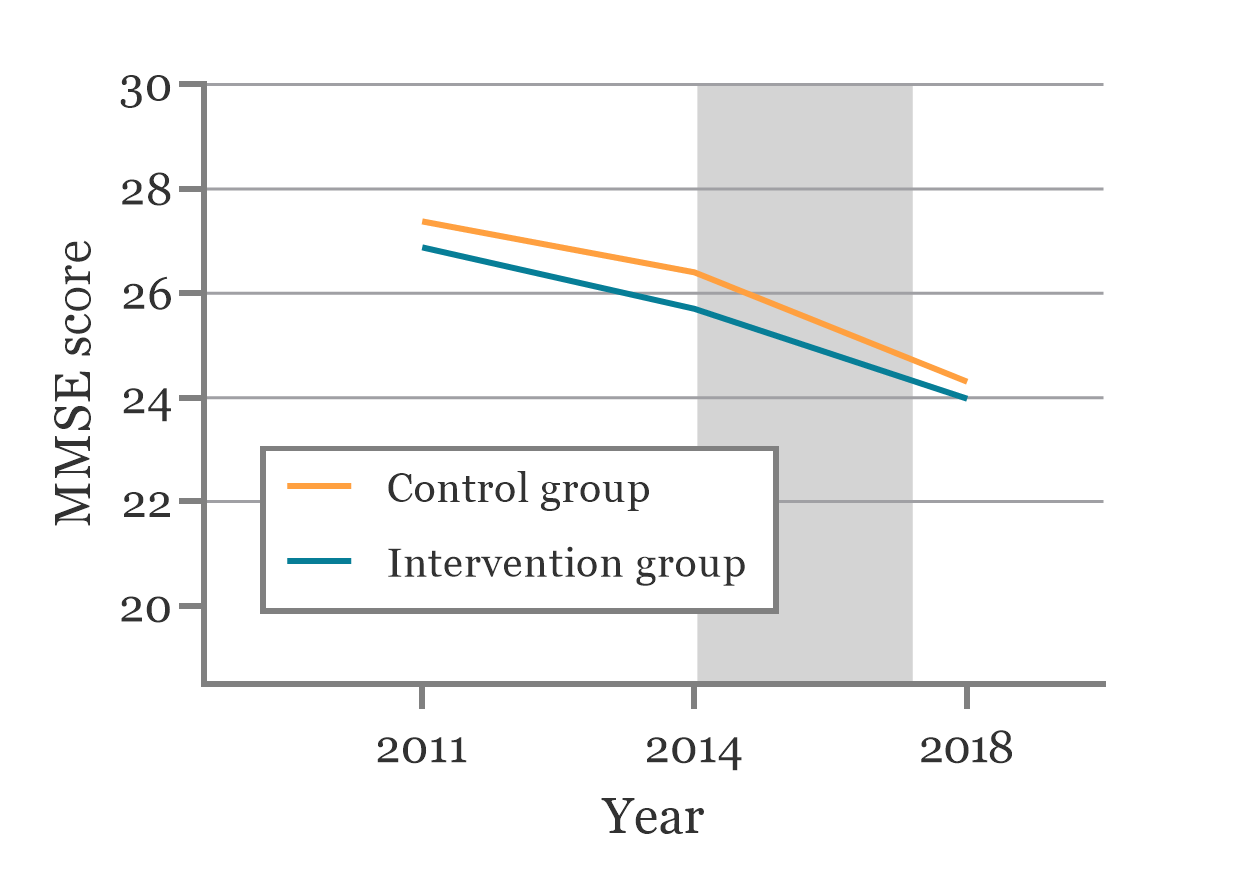

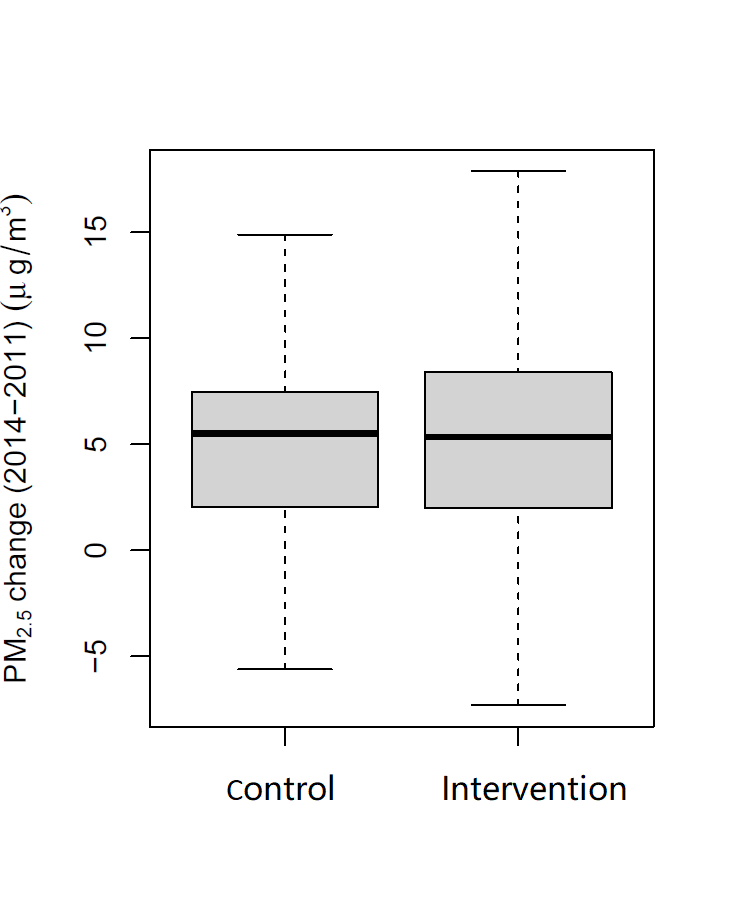


**a**

**b**

**Figure A1. Trend in MMSE score and PM2.5 exposure before the China’s Clean Air Act (CCAA).**

Linear trend of associations between cognitive function (Fig A1. a) and PM2.5 exposure (Fig A1. b) in intervention group versus the control group before the 2014 CCAA implementation (2011 and 2014 waves of CLHLS dataset). We assessed parallel trends in MMSE score between CCAA implementation group and non-implementation group before 2014. The unadjusted and adjusted models comparing pre-implementation trends in CCAA implementation group and non-implementation group did not reveal any significant differences for MMSE scores (*P* for unadjusted model = 0.618 and *P* for adjusted model = 0.277), offering support for the difference-in-differences study design. Adjusted model controlling for age, sex, education, marital status, ethnicity, rural/urban residence, occupation before retirement, survey month, alcohol drinking, smoking, physical activity, fruit intake, vegetable intake, water quality, living condition, and income source.


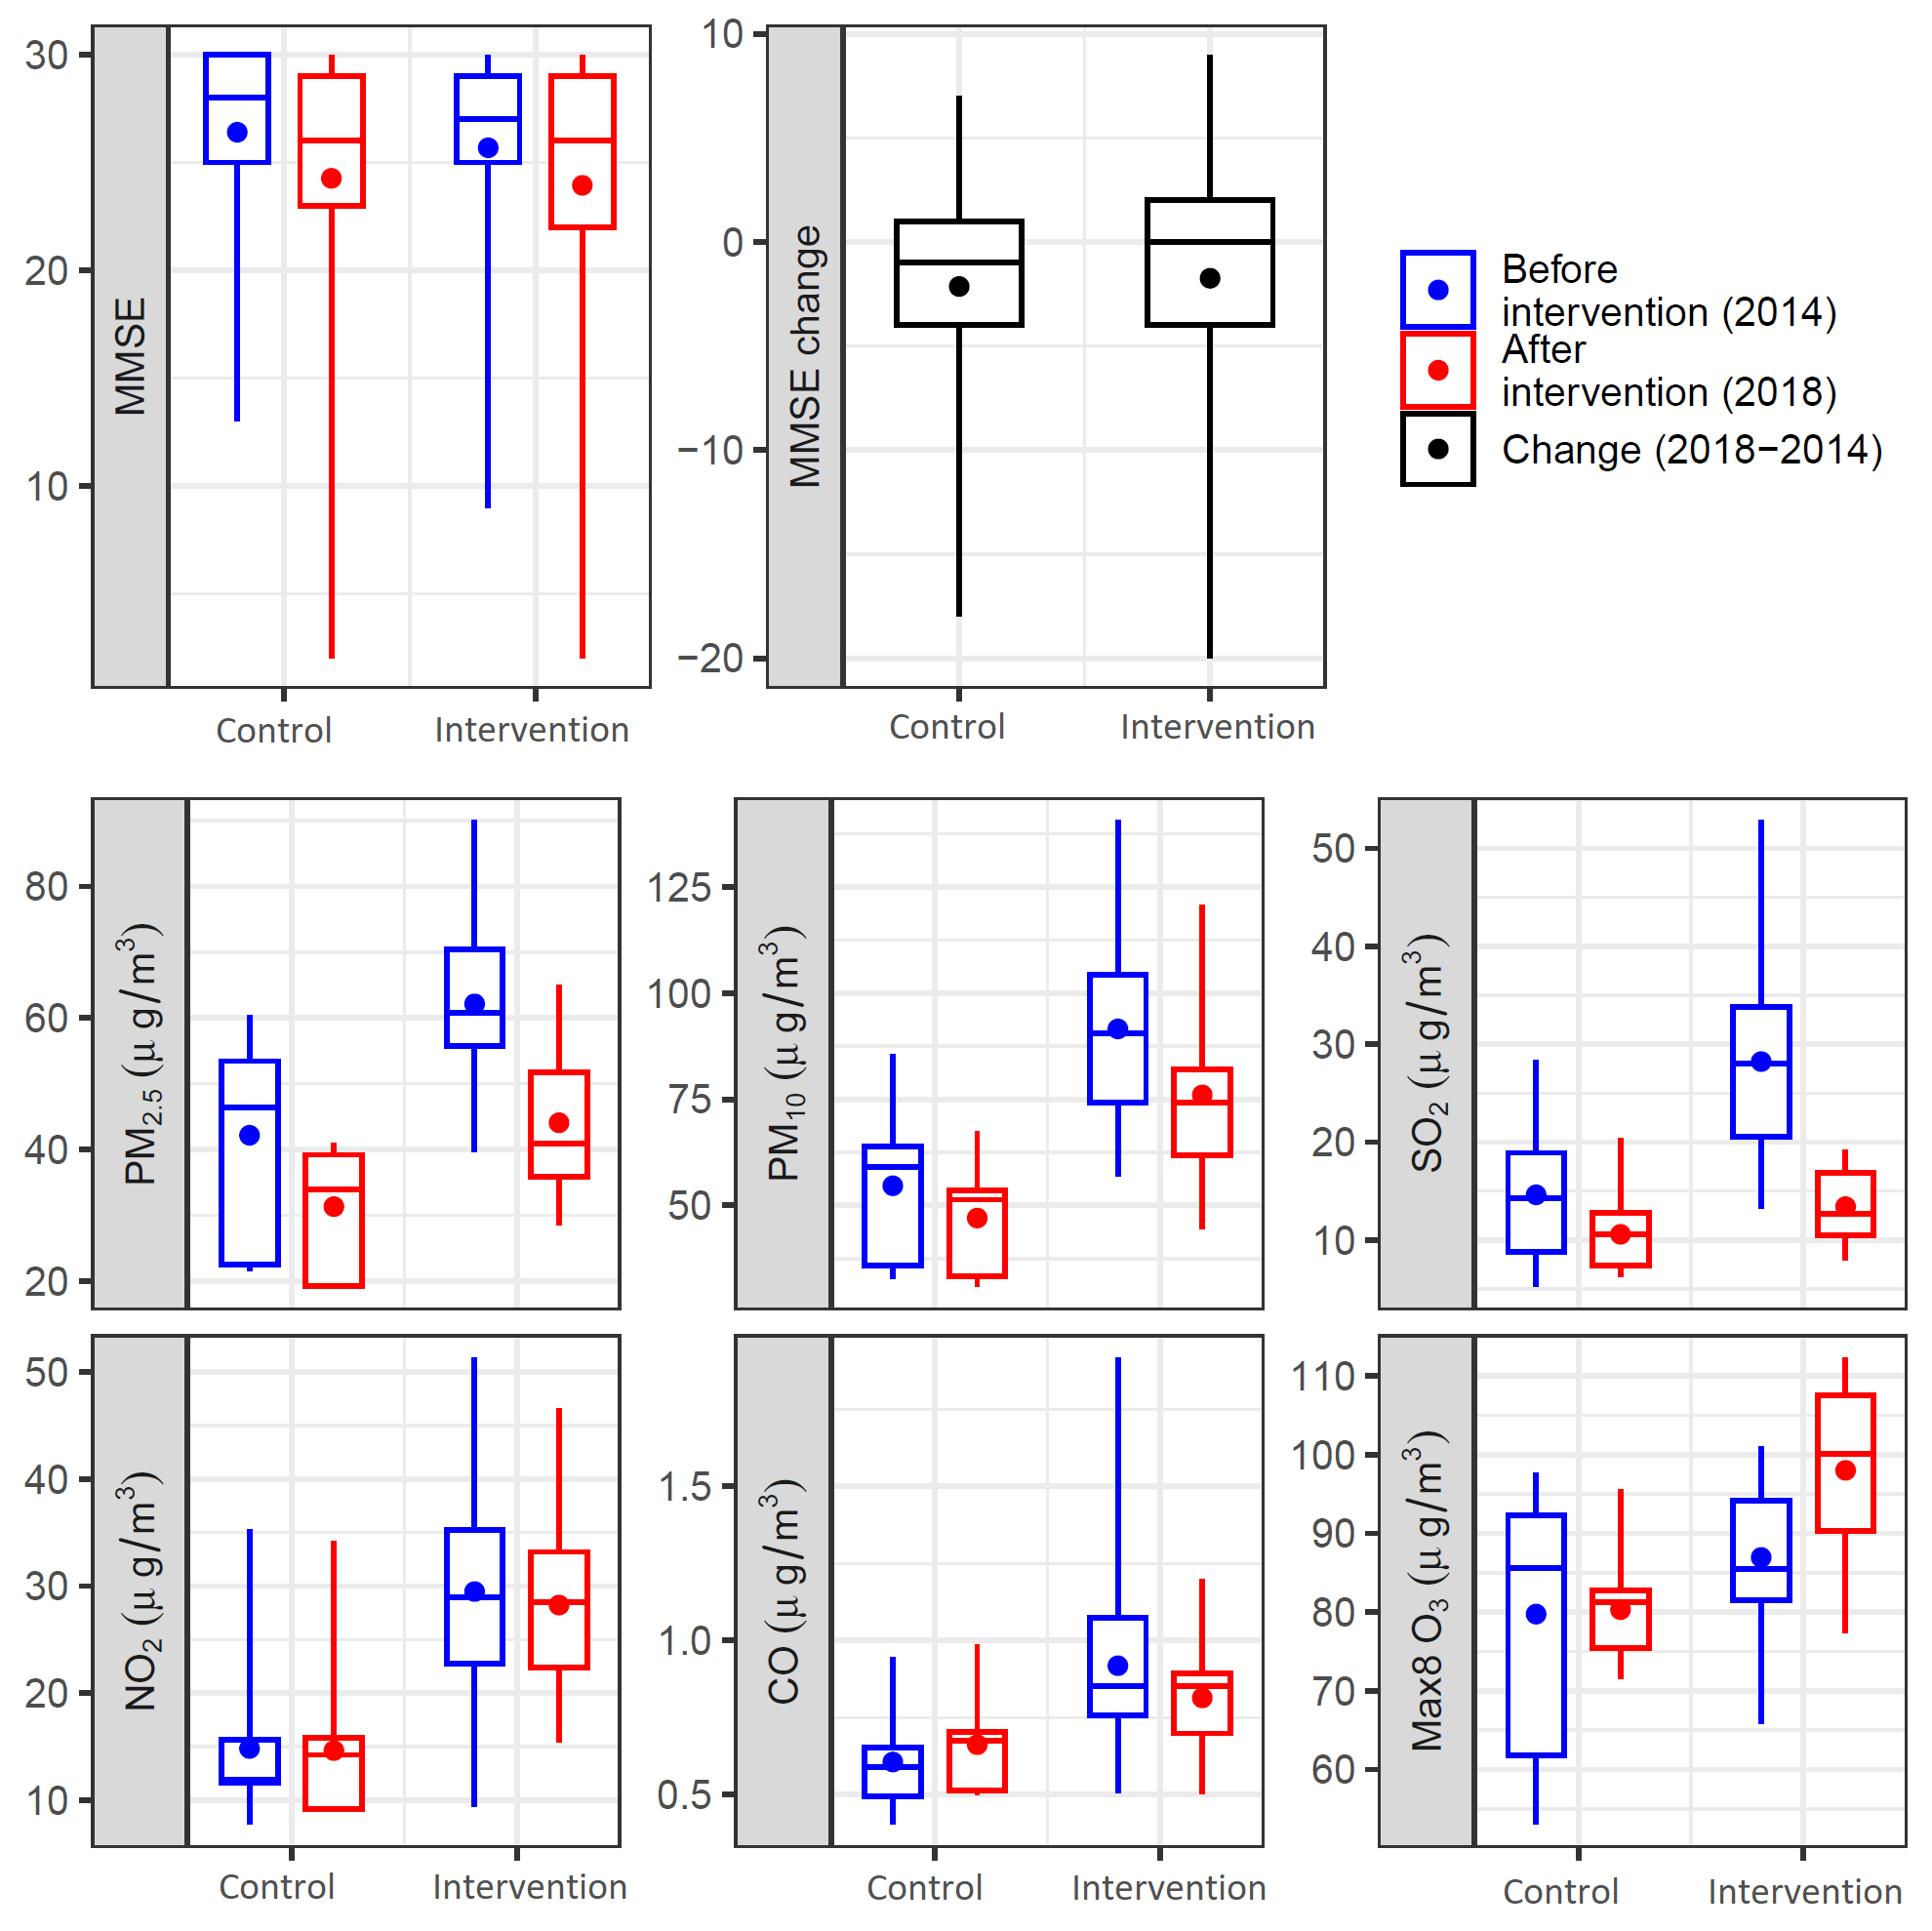
**Figure A2: Estimated associations of long-term exposure to air pollutants with cognitive function score (MMSE) by survey waves and groups.**

Intervention group: target of annual PM2.5 reduction ≥ 5%under China’s Clean Air Act (CCAA); Control group: without reduction target under CCAA. MMSE: Mini-Mental State Examination. Max 8-hr O3, max 8-hour daily average ozone measurements.

**
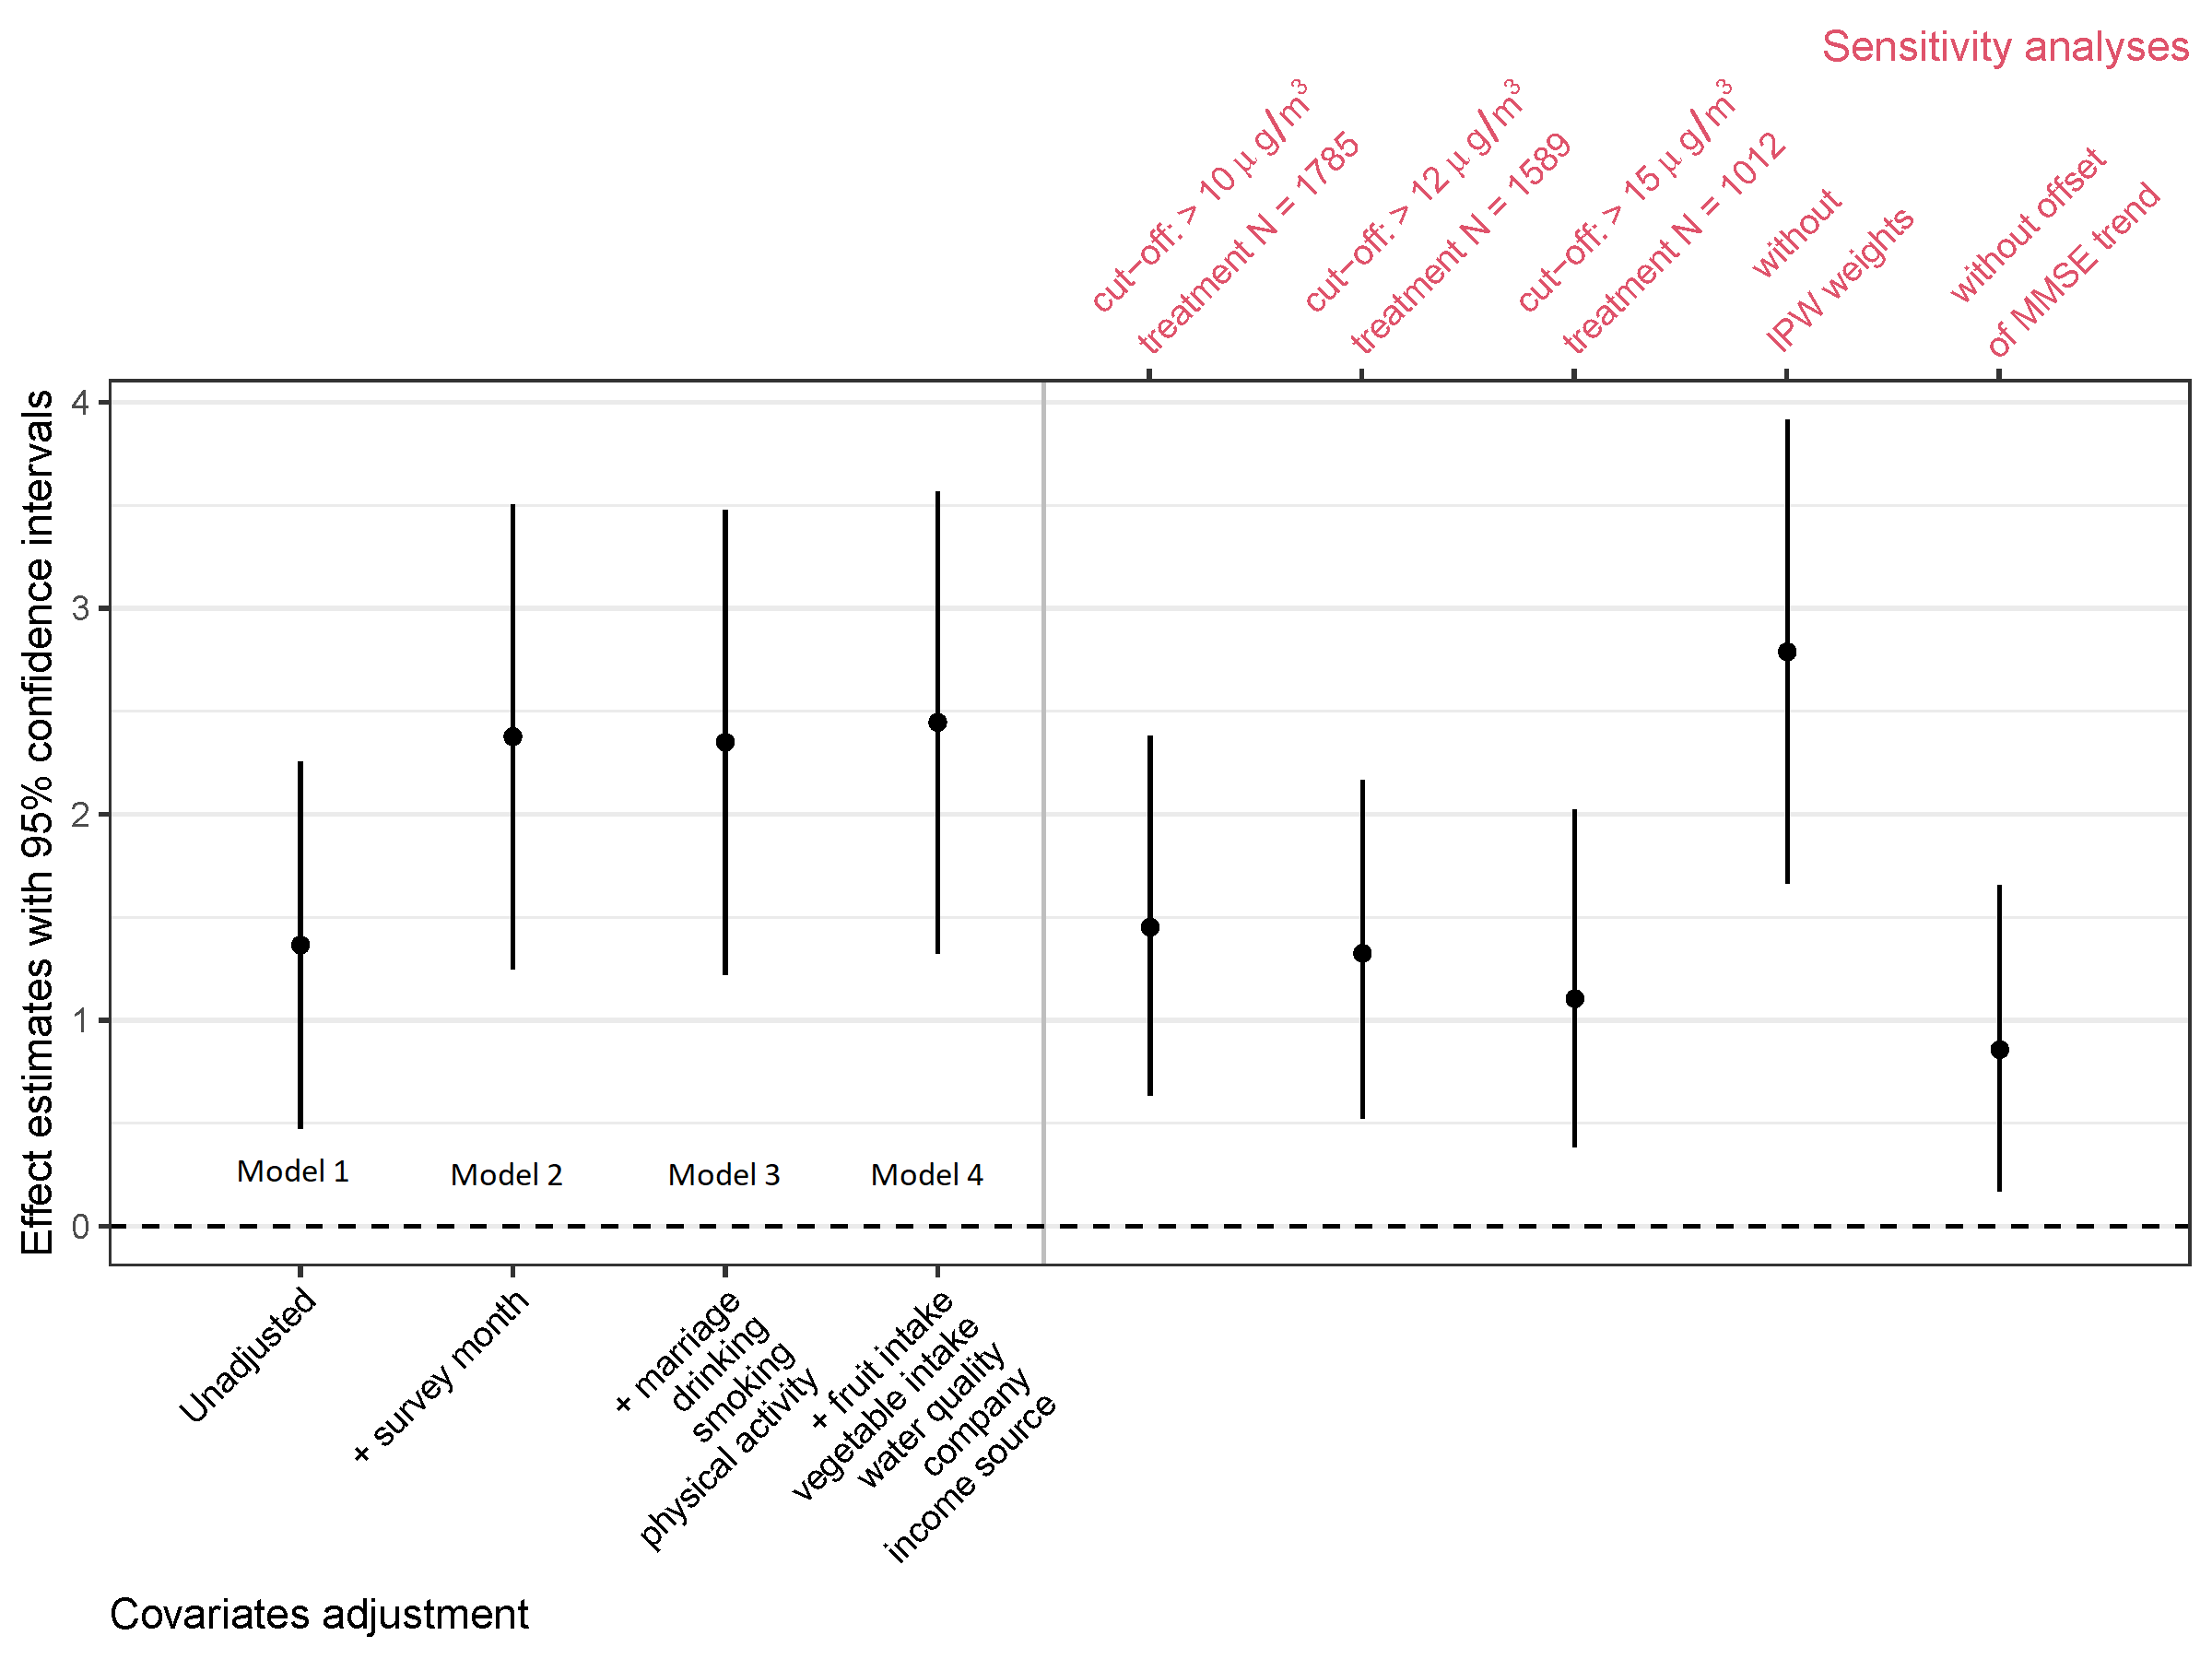
**

**Figure A3: Sensitivity analysis of estimated effect of the CCAA on changes in MMSE score by difference-in-differences models.**

|  |  |  | Adjusted MMSE score (95% CI) | *P* for interaction |
| --- | --- | --- | --- | --- |
| Age | 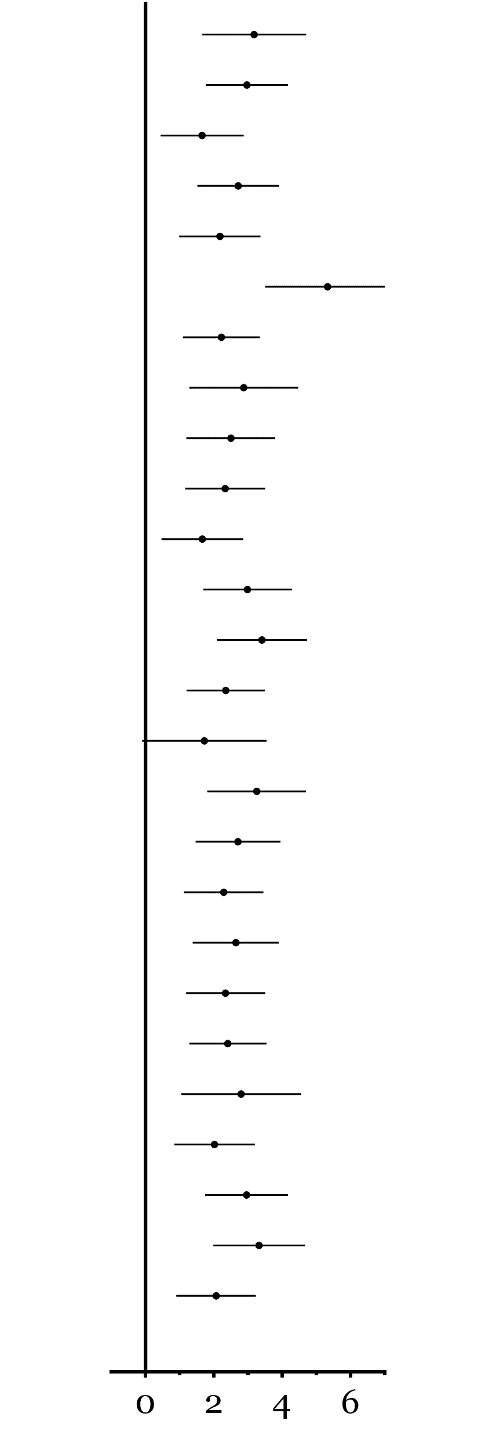75- |  | 3.18 (1.66, 4.70) | 0.004 |
| 76~85 |  | 2.97 (1.76, 4.17) |
| 86+ |  | 1.66 (0.45, 2.88) |
| Sex | Male |  | 2.72 (1.52, 3.91) | 0.188 |
| Female |  | 2.18 (0.99, 3.37) |
| Ethnicity | Other |  | 5.33 (3.51, 7.16) | <0.001 |
| Han |  | 2.26 (1.10, 3.35) |
| Residence | Urban |  | 2.87 (1.28, 4.47) | 0.717 |
| Sub-urban |  | 2.50 (1.20, 3.80) |
| Rural |  | 2.33 (1.16, 3.50) |
| Education | < 1 year |  | 1.66 (0.47, 2.86) | 0.001 |
| 1-5 years |  | 2.99 (1.69, 4.29) |
| > 5 years |  | 3.41 (2.09, 4.73) |
| Occupation | Agriculture |  | 2.35 (1.21, 3.50) | 0.159 |
| Other |  | 1.72 (-0.10, 3.55) |
| Employee |  | 3.25 (1.82, 4.70) |
| Smoking | Yes |  | 2.71 (1.47, 3.95) | 0.330 |
| No |  | 2.29 (1.13, 3.46) |
| Drinking | Yes |  | 2.65 (1.39, 3.91) | 0.493 |
| No |  | 2.34 (1.19, 3.50) |
| Physical labour | Yes |  | 2.41 (1.29, 3.54) | 0.603 |
| No |  | 2.80 (1.05, 4.56) |
| Marriage | No |  | 2.02 (0.84, 3.21) | 0.028 |
| Yes |  | 2.96 (1.75, 4.17) |
| Physical activity | Yes |  | 3.32 (1.99, 4.66) | 0.018 |
| No |  | 2.07 (0.91, 3.23) |

**Figure A4: The estimated effect of the CCAA on cognitive function (MMSE score) by different subpopulations.**

CCAA: China’s Clean Air Act. MMSE: Mini-Mental State Examination.


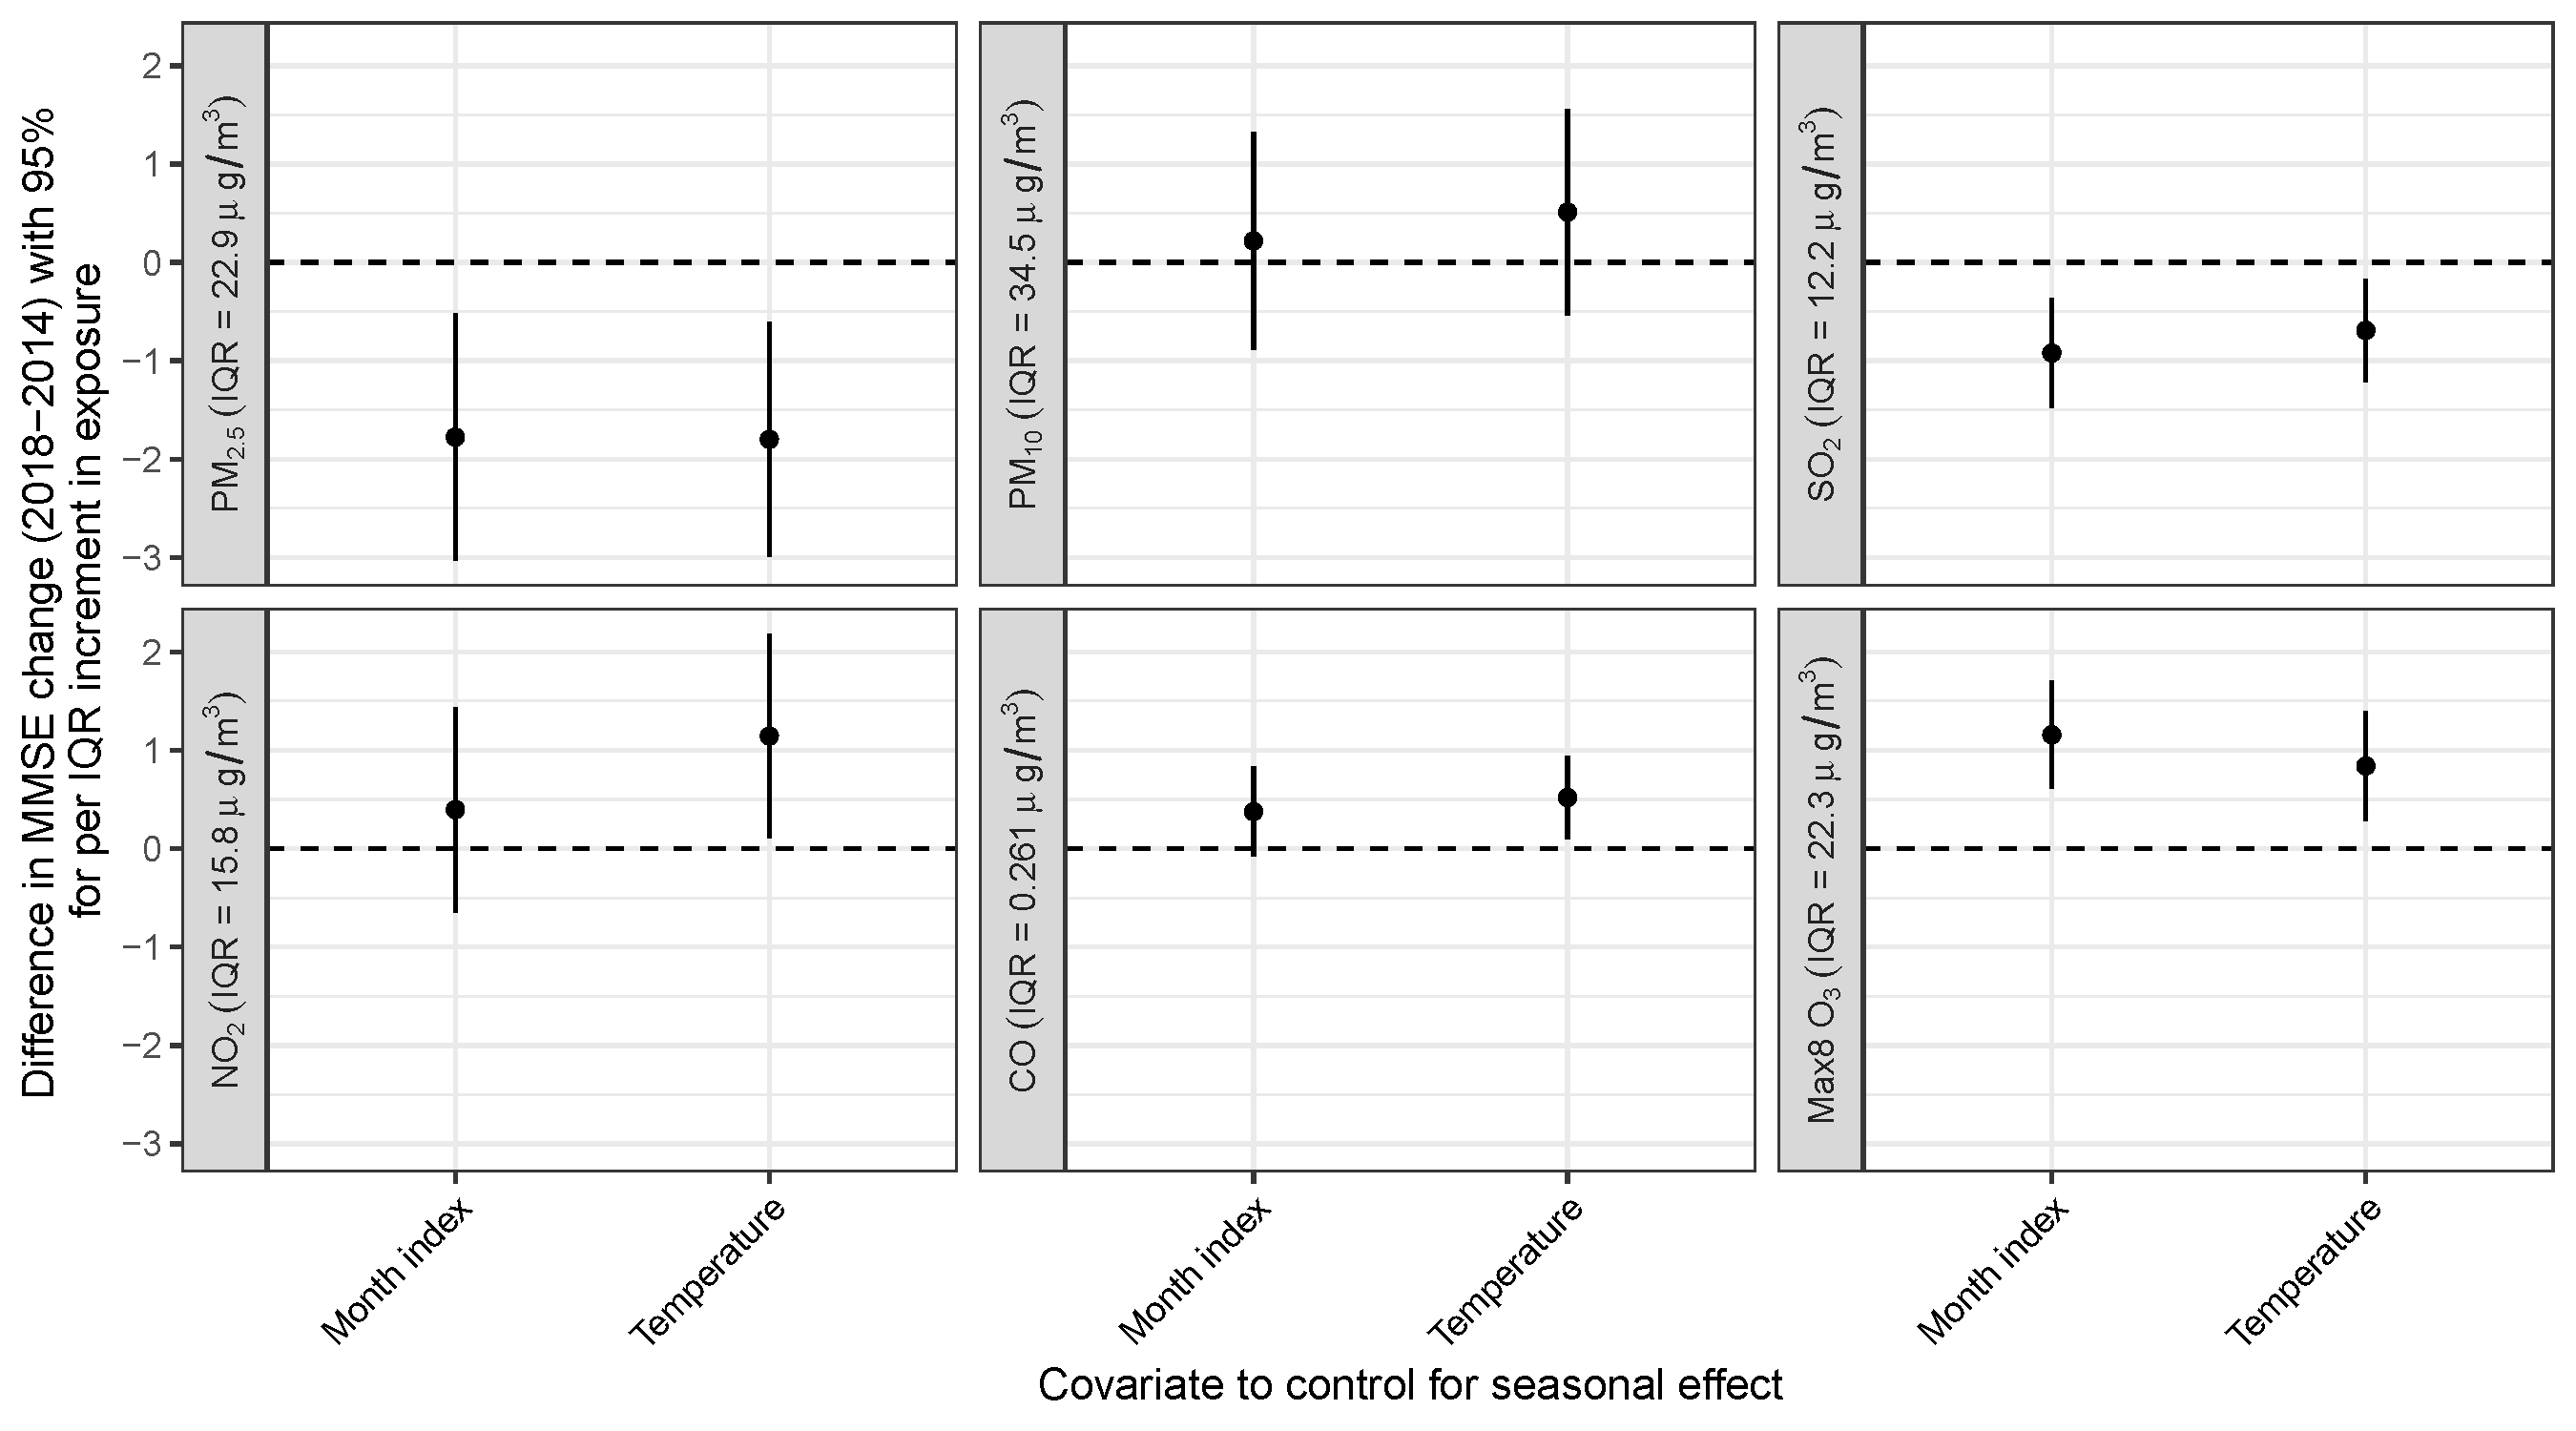


**Figure A5: The estimated associations between long-term air pollution exposure and cognitive function by further controlling for exposure seasons.**

**Figure A6: The estimated associations between air pollution changes due to CCAA and MMSE score change by different subpopulations.**

**Figure A7: Estimated associations of the PM2.5 and O3 joint exposures with MMSE score.**

The bottom panels present the estimated association between MMSE change and exposure change for an air pollutant, given that the other pollutant is constant.

**Figure A8: Estimated associations of the SO2 and O3 joint exposures with MMSE score.**

The bottom panels present the estimated association between MMSE change and exposure change for an air pollutant, given that the other pollutant is constant.

**Figure A9: Estimated associations of the PM2.5 and SO2 joint exposures with MMSE score.**

The bottom panels present the estimated association between MMSE change and exposure change for an air pollutant, given that the other pollutant is constant.

**Appendix References**

1. State Council of the People’s Republic of China. Notice of the general office of the state council on issuing the air pollution prevention and control action plan. 2013.

2. Zhang Q, Zheng Y, Tong D, et al. Drivers of improved PM2.5 air quality in China from 2013 to 2017. *Proc Natl Acad Sci U S A* 2019; **116**(49): 24463-9.

3. Xue T, Liu J, Zhang Q, et al. Rapid improvement of PM2.5 pollution and associated health benefits in China during 2013–2017. *Science China Earth Sciences* 2019; **62**(12): 1847-56.

4. Xiao T, Lei K, Jiang Z, et al. Data From:A Six-year long High-resolution Air Quality Reanalysis Dataset over China from 2013 to 2018. Science Data Bank; 2020.

5. Xue T, Zhu T, Zheng YX, Zhang Q. Declines in mental health associated with air pollution and temperature variability in China. *Nat Commun* 2019; **10**.

6. Katzman R, Zhang M, Ouang Ya Q, et al. A Chinese version of the mini-mental state examination; Impact of illiteracy in a Shanghai dementia survey. *Journal of Clinical Epidemiology* 1988; **41**(10): 971-8.

7. Zeng Y, Feng Q, Hesketh T, Christensen K, Vaupel JW. Survival, disabilities in activities of daily living, and physical and cognitive functioning among the oldest-old in China: a cohort study. *Lancet* 2017; **389**(10079): 1619-29.

8. Lv X, Li W, Ma Y, et al. Cognitive decline and mortality among community-dwelling Chinese older people. *BMC Med* 2019; **17**(1): 63.

9. Clifford A, Lang L, Chen R, Anstey KJ, Seaton A. Exposure to air pollution and cognitive functioning across the life course--A systematic literature review. *Environ Res* 2016; **147**: 383-98.

10. Cummings JL. Mini-Mental State Examination: Norms, Normals, and Numbers. *JAMA* 1993; **269**(18): 2420-1.

11. Zhang JJ, Wei Y, Fang Z. Ozone Pollution: A Major Health Hazard Worldwide. *Front Immunol* 2019; **10**: 2518.

12. Li K, Jacob DJ, Liao H, Shen L, Zhang Q, Bates KH. Anthropogenic drivers of 2013-2017 trends in summer surface ozone in China. *Proc Natl Acad Sci U S A* 2019; **116**(2): 422-7.
